# Supplementary material for: A simple and dual responsive efficient new Schiff base chemoreceptor for selective sensing of F− and Hg2+: application to bioimaging in living cells and mimicking of molecular logic gates
Source: Royal Society of Chemistry journal article supplement (doi:10.1039/c5ra06105a), 2015-01-01
Supplement: c5ra06105a1.pdf [file c5ra06105a1.pdf]

## Supporting Information

# **A simple and dual responsive efficient new Schiff base chemoreceptor for selective sensing of F<sup>-</sup> and Hg<sup>2+</sup>: application to bioimaging in living cells and mimicking of molecular logic gates†**

Additi Roy Chowdhury,<sup>ab</sup> Pritam Ghosh,<sup>a</sup> Biswajit Gopal Roy,<sup>c</sup> Subhra Kanti Mukhopadhyay,<sup>d</sup> Partha Mitra<sup>e</sup> and Priyabrata Banerjee<sup>\*ab</sup>

<sup>a</sup> Surface Engineering & Tribology Group, CSIR-Central Mechanical Engineering Research Institute, Mahatma Gandhi Avenue, Durgapur-713209, WB, India. Fax: +91-343- 2546 745; Tel: +91-343-6452220; E-mail: [pr\\_banerjee@cmeri.res.in](mailto:pr_banerjee@cmeri.res.in) and [priyabrata\\_banerjee@yahoo.co.in](mailto:priyabrata_banerjee@yahoo.co.in)

Webpage: [www.cmeri.res.in](http://www.cmeri.res.in) and [www.priyabratabanerjee.in](http://www.priyabratabanerjee.in)

<sup>b</sup> Academy of Scientific and Innovative Research at CSIR-CMERI, Durgapur 713209, India.

<sup>c</sup> Department of Chemistry, Sikkim University, Gangtok-737102, Sikkim, India.

<sup>d</sup> Department of Microbiology, The University of Burdwan, Burdwan-713104, India.

<sup>e</sup> Indian Association for the Cultivation of Science, Jadavpur, Kolkata 700032, India.

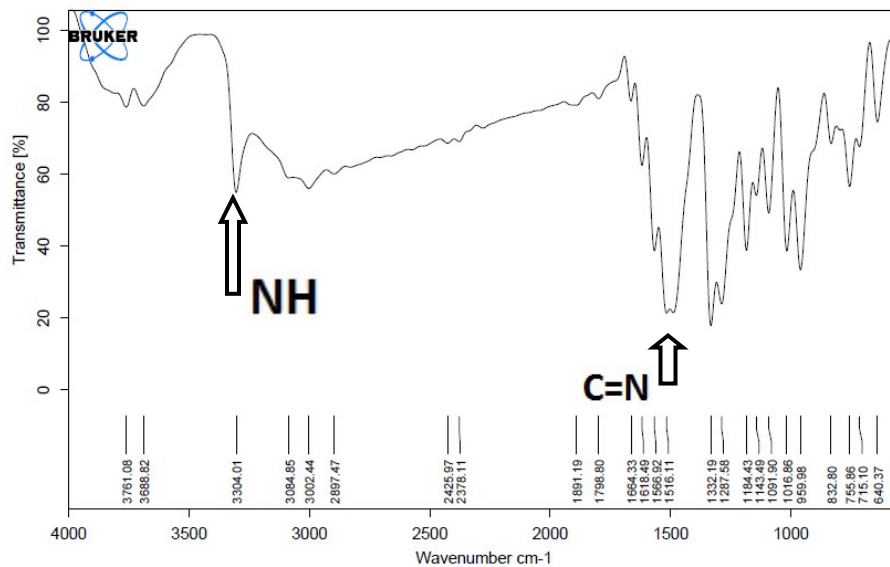

Fig. S1 IR data of NPMP.

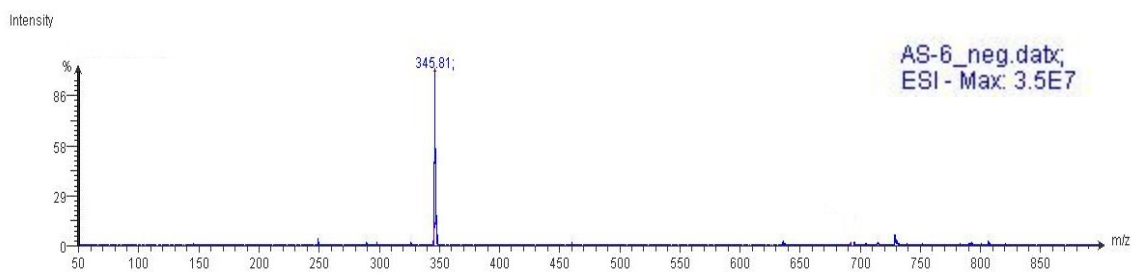

Fig. S2 ESI-Mass data of NPMP.

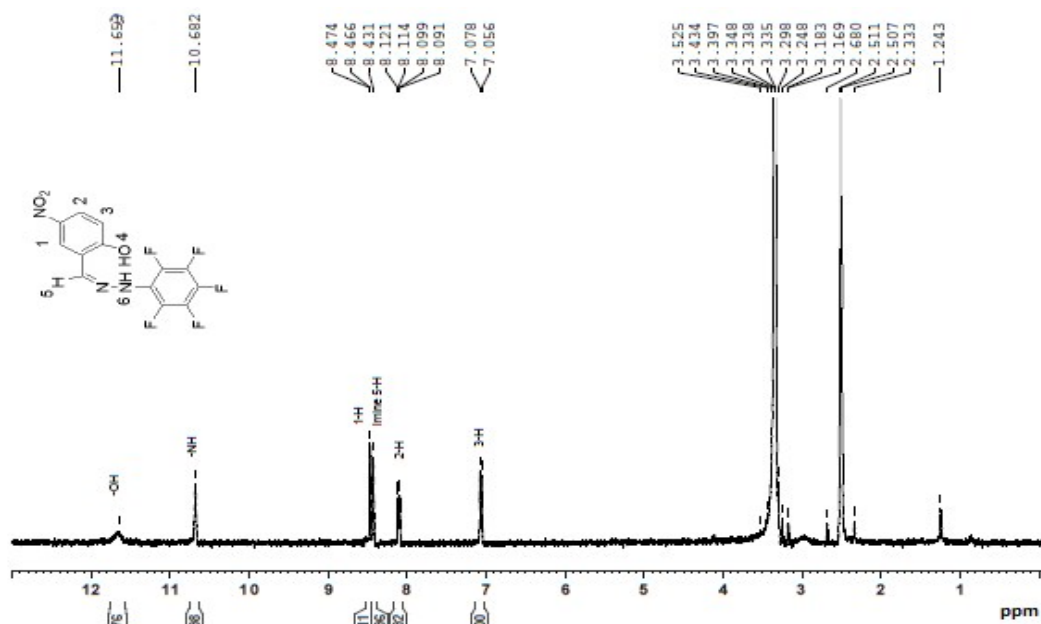

Fig. S3 <sup>1</sup>H NMR data of NPMP in DMSO-d<sub>6</sub>.

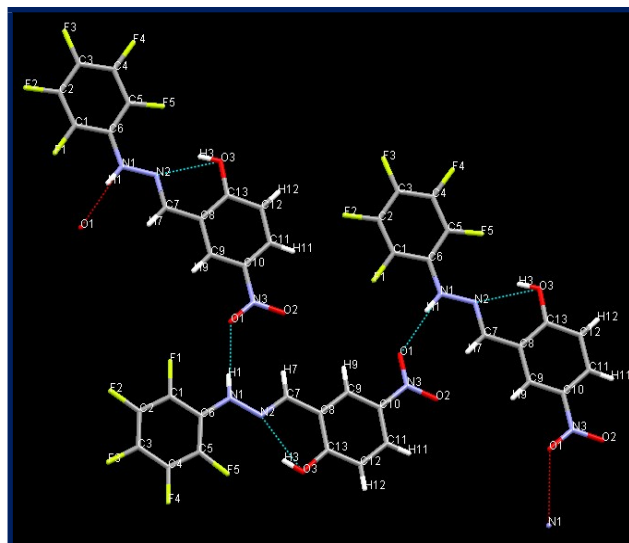

**Fig. S4** Wireframe network showing intra & intermolecular hydrogen bonding in NPMP.

**Table S1** Crystallographic data of NPMP

| Crystal Data             |                              |  |
|--------------------------|------------------------------|--|
| Formula                  | C13 H6 F5 N3 O3              |  |
| Formula Weight           | 347.21                       |  |
| Crystal System           | Monoclinic                   |  |
| Space group              | P21/c (No. 14)               |  |
| a, b, c [Angstrom]       | 8.404(2) 13.281(3) 11.867(3) |  |
| alpha, beta, gamma [deg] | 90 102.612(5) 90             |  |
| V [Ang**3]               | 1292.6(5)                    |  |
| Z                        | 4                            |  |
| D(calc) [g/cm**3]        | 1.784                        |  |
| Mu(MoKa) [ /mm ]         | 0.175                        |  |
| F(000)                   | 696                          |  |
| Crystal Size [mm]        | 0.16 x 0.18 x 0.24           |  |

| Data Collection                         |                                |
|-----------------------------------------|--------------------------------|
| Temperature (K)                         | 293                            |
| Radiation [Angstrom]                    | MoKa 0.71073                   |
| Theta Min-Max [Deg]                     | 2.3, 25.0                      |
| Dataset                                 | -9: 9 ; -15: 15 ; -14: 14      |
| Tot., Uniq. Data, R(int)                | 9515, 2166, 0.087              |
| Observed data [I > 2.0 sigma(I)]        | 1867                           |
| Refinement                              |                                |
| Nref, Npar                              | 2166, 219                      |
| R, wR2, S                               | 0.0751, 0.2322, 1.22           |
| $w = 1/[\sigma^2(F_o^2) + (0.1675P)^2]$ | where $P = (F_o^2 + 2F_c^2)/3$ |
| Max. and Av. Shift/Error                | 0.00, 0.00                     |
| Min. and Max. Resd. Dens. [e/Ang^3]     | -0.63, 0.59                    |

**Table S2** Selected bond distances (angstrom) of NPMP

|    |      |          |     |      |          |
|----|------|----------|-----|------|----------|
| F1 | -C1  | 1.357(3) | C2  | -C3  | 1.374(3) |
| F2 | -C2  | 1.344(3) | C3  | -C4  | 1.378(4) |
| F3 | -C3  | 1.352(3) | C4  | -C5  | 1.395(4) |
| F4 | -C4  | 1.340(3) | C5  | -C6  | 1.397(3) |
| F5 | -C5  | 1.345(3) | C7  | -C8  | 1.447(4) |
| O1 | -N3  | 1.230(3) | C8  | -C13 | 1.434(4) |
| O2 | -N3  | 1.241(3) | C8  | -C9  | 1.405(4) |
| O3 | -C13 | 1.346(3) | C9  | -C10 | 1.375(4) |
| O3 | -H3  | 0.8200   | C10 | -C11 | 1.404(4) |
| N1 | -N2  | 1.371(3) | C11 | -C12 | 1.379(4) |
| N1 | -C6  | 1.382(3) | C12 | -C13 | 1.393(4) |
| N2 | -C7  | 1.288(3) | C7  | -H7  | 0.9300   |
| N3 | -C10 | 1.452(4) | C9  | -H9  | 0.9300   |
| N1 | -H1  | 0.8600   | C11 | -H11 | 0.9300   |
| C1 | -C6  | 1.395(4) | C12 | -H12 | 0.9300   |
| C1 | -C2  | 1.380(4) |     |      |          |

**Table S3** Selected bond angles (degree) of NPMP

|     |     |      |          |     |      |      |          |
|-----|-----|------|----------|-----|------|------|----------|
| C13 | -O3 | -H3  | 110.00   | C1  | -C6  | -C5  | 116.0(2) |
| N2  | -N1 | -C6  | 121.1(2) | N1  | -C6  | -C5  | 126.4(2) |
| N1  | -N2 | -C7  | 116.8(2) | N2  | -C7  | -C8  | 120.7(2) |
| O1  | -N3 | -C10 | 118.4(2) | C7  | -C8  | -C13 | 122.8(2) |
| O2  | -N3 | -C10 | 118.5(2) | C7  | -C8  | -C9  | 119.5(2) |
| O1  | -N3 | -O2  | 123.1(2) | C9  | -C8  | -C13 | 117.7(2) |
| N2  | -N1 | -H1  | 119.00   | C8  | -C9  | -C10 | 120.2(2) |
| C6  | -N1 | -H1  | 119.00   | N3  | -C10 | -C9  | 118.9(2) |
| C2  | -C1 | -C6  | 123.0(2) | N3  | -C10 | -C11 | 119.1(2) |
| F1  | -C1 | -C6  | 118.5(2) | C9  | -C10 | -C11 | 122.1(2) |
| F1  | -C1 | -C2  | 118.5(2) | C10 | -C11 | -C12 | 118.9(2) |
| C1  | -C2 | -C3  | 119.8(2) | C11 | -C12 | -C13 | 120.5(2) |
| F2  | -C2 | -C3  | 120.6(2) | O3  | -C13 | -C8  | 121.4(2) |
| F2  | -C2 | -C1  | 119.6(2) | O3  | -C13 | -C12 | 117.9(2) |
| F3  | -C3 | -C2  | 120.3(2) | C8  | -C13 | -C12 | 120.7(2) |
| F3  | -C3 | -C4  | 120.3(2) | N2  | -C7  | -H7  | 120.00   |
| C2  | -C3 | -C4  | 119.4(2) | C8  | -C7  | -H7  | 120.00   |
| C3  | -C4 | -C5  | 120.5(2) | C8  | -C9  | -H9  | 120.00   |
| F4  | -C4 | -C3  | 120.9(2) | C10 | -C9  | -H9  | 120.00   |
| F4  | -C4 | -C5  | 118.6(2) | C10 | -C11 | -H11 | 121.00   |
| F5  | -C5 | -C4  | 116.7(2) | C12 | -C11 | -H11 | 121.00   |
| F5  | -C5 | -C6  | 122.0(2) | C11 | -C12 | -H12 | 120.00   |
| C4  | -C5 | -C6  | 121.4(2) | C13 | -C12 | -H12 | 120.00   |
| N1  | -C6 | -C1  | 117.6(2) |     |      |      |          |

**Table S4** Hydrogen bonding in NPMP

|                |        |        |          |        |       |
|----------------|--------|--------|----------|--------|-------|
| N1 -- H1 .. F1 | 0.8600 | 2.3400 | 2.682(3) | 104.00 | .     |
| N1 -- H1 .. O1 | 0.8600 | 2.2200 | 3.065(3) | 168.00 | 2_746 |
| O3 -- H3 .. F5 | 0.8200 | 2.3800 | 3.029(3) | 136.00 | .     |
| O3 -- H3 .. N2 | 0.8200 | 1.9200 | 2.643(3) | 147.00 | .     |
| C7 -- H7 .. O2 | 0.9300 | 2.4600 | 3.365(4) | 165.00 | 2_746 |

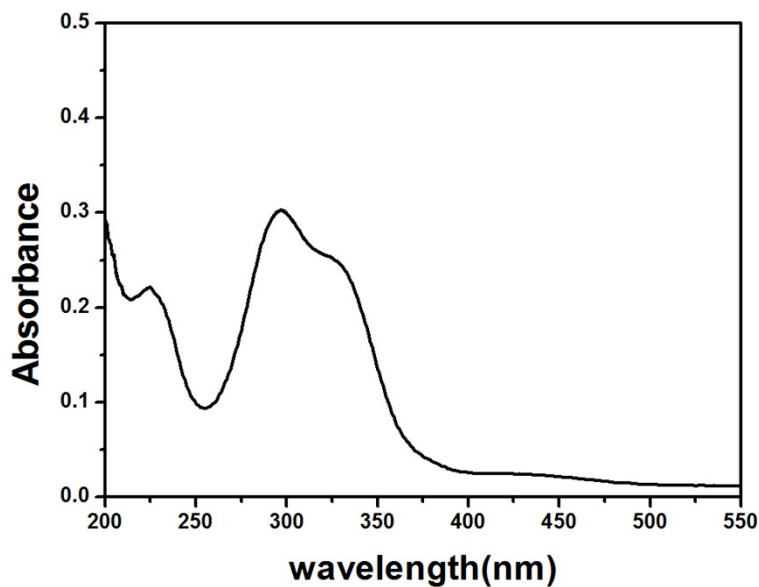

**Fig. S5** UV-Vis spectrum of NPMP in DMSO.

*Benesi-Hildebrand Equation and Plot:*

The association constant of a complex formed in between NPMP and F<sup>-</sup> has been determined from the following complex equilibrium.

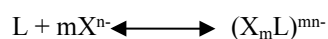

$$\frac{[(X_mL)]^{mn-}}{[L][X^{n-}]^m}$$

K=

For 1:1 type complex formation with m=1 following the Benesi-Hildebrand relation, can be expressed in terms of optical density (A) as follows:

$$A = \frac{A_0 + A_1 K [X^{n-}]}{1 + K [X^{n-}]}$$

$$\text{Or, } \frac{1}{A - A_0} = \frac{1}{(A_1 - A_0)} + \frac{1}{(A_1 - A_0) K [X^{n-}]}$$

Where  $[X^n]$ ,  $[L]$  and  $[(X_mL)^{mn}]$  are the concentration of the added anion, receptor and the complexation between anions and receptors, respectively.  $A_0$ ,  $A$  and  $A_1$  indicates the optical density or absorbance at a particular wavelength of NPMP without adding any anion, absorbance after adding anion at every successive step and excess amount of added anion, respectively. The binding constant or association constant  $K$  ( $M^{-1}$  or  $M^{-2}$ ) is determined from the ratio of intercept and slope of Benesi-Hildebrand plot of optical density.

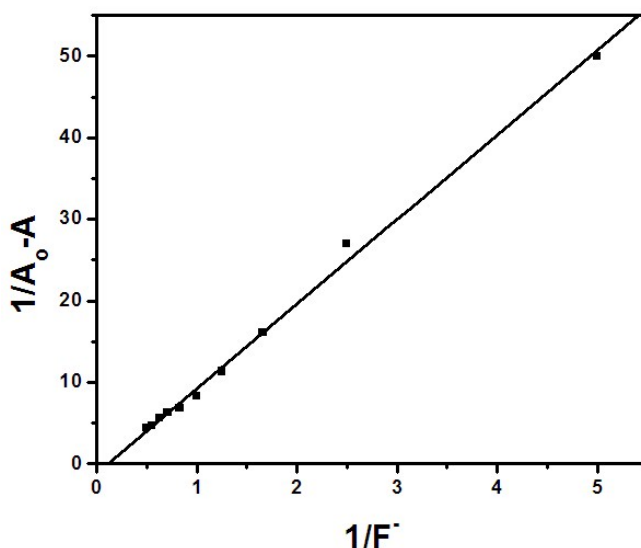

Fig. S6 B-H plot of NPMP vs. TBAF.

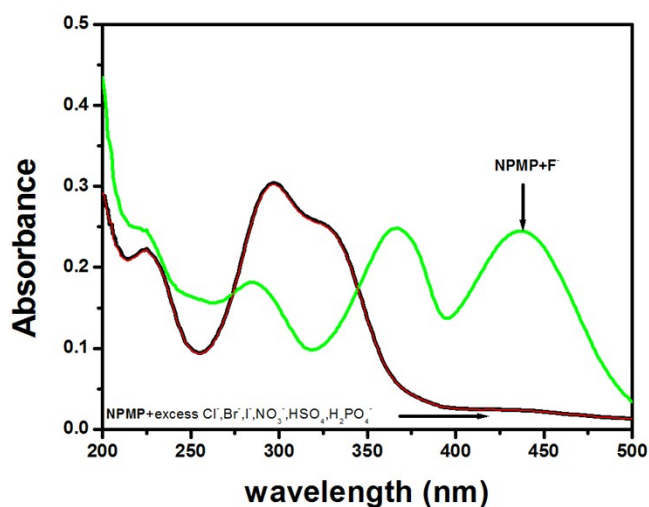

(a)

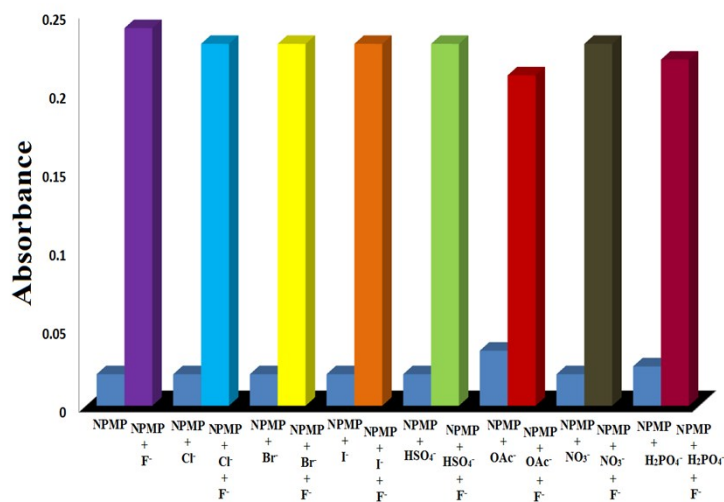

(b)

**Fig. S7** (a) UV-Vis spectral changes of NPMP ( $2 \times 10^{-5} \text{M}$ ) with other TBA salts of in 9:1 v/v DMSO-HEPES buffer at pH 7.4 (0-2eq), (b) 2D plot showing interference of  $\text{F}^-$  in presence of other anions.

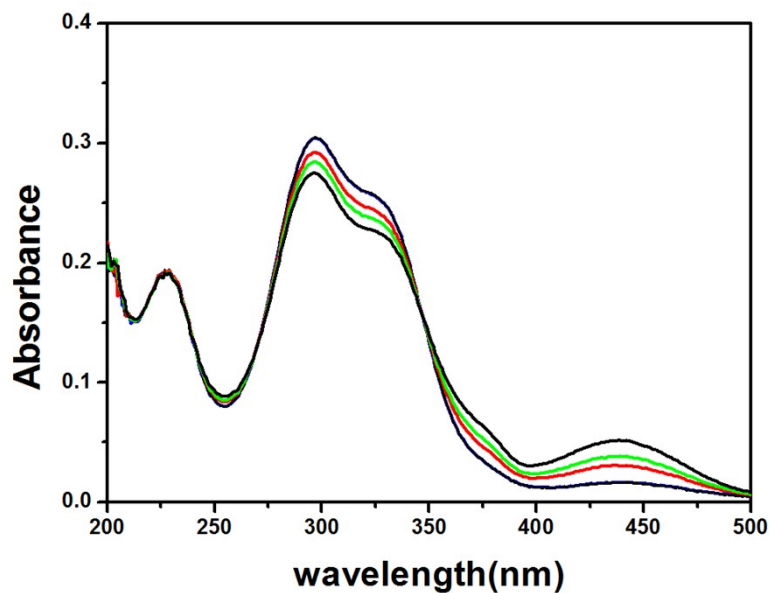

**Fig. S8** UV-Vis spectral changes of NPMP ( $2 \times 10^{-5} \text{M}$ ) with TBA salts of  $\text{OAc}^-$  in 9:1 v/v DMSO-HEPES buffer at pH 7.4 (0-2eq).

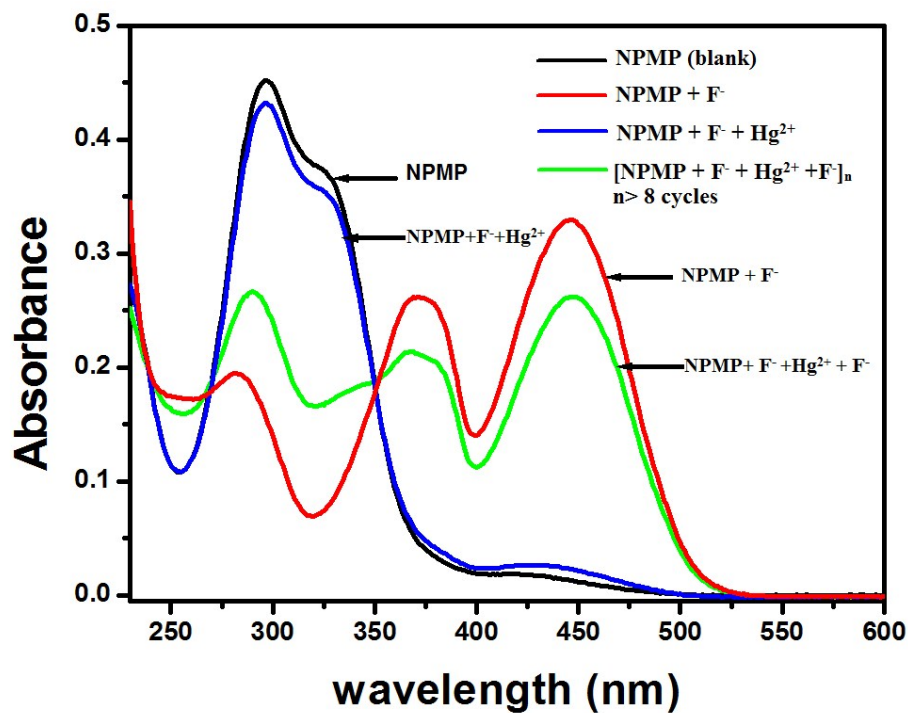

**Fig. S9** UV-Vis spectral changes of NPMP ( $2 \times 10^{-5} \text{M}$ ) with  $\text{F}^-$  ( $2 \times 10^{-4} \text{M}$ ) followed by  $\text{Hg}^{2+}$  ( $10^{-4} \text{M}$ ) and further addition of  $\text{F}^-$  in 9:1 v/v DMSO-HEPES buffer at pH 7.4 in same repetitive manner.

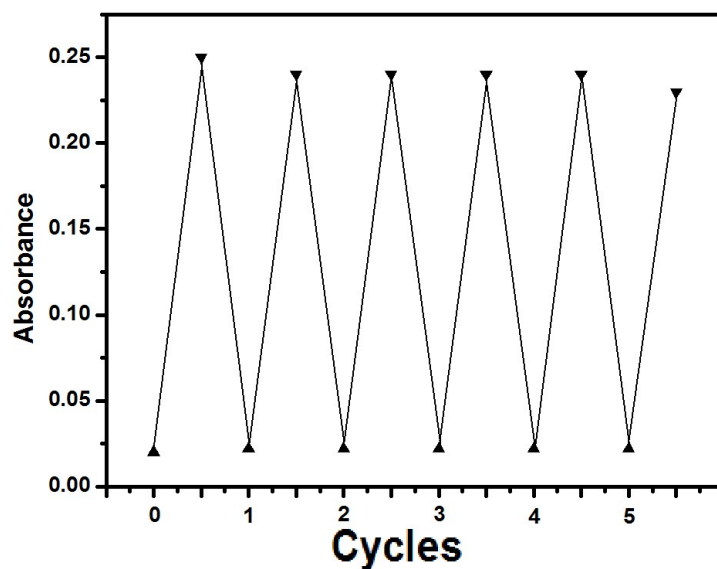

Fig. S10 Repeatability experimentation of NPMP in presence of  $F^-$  and  $Hg^{2+}$ .

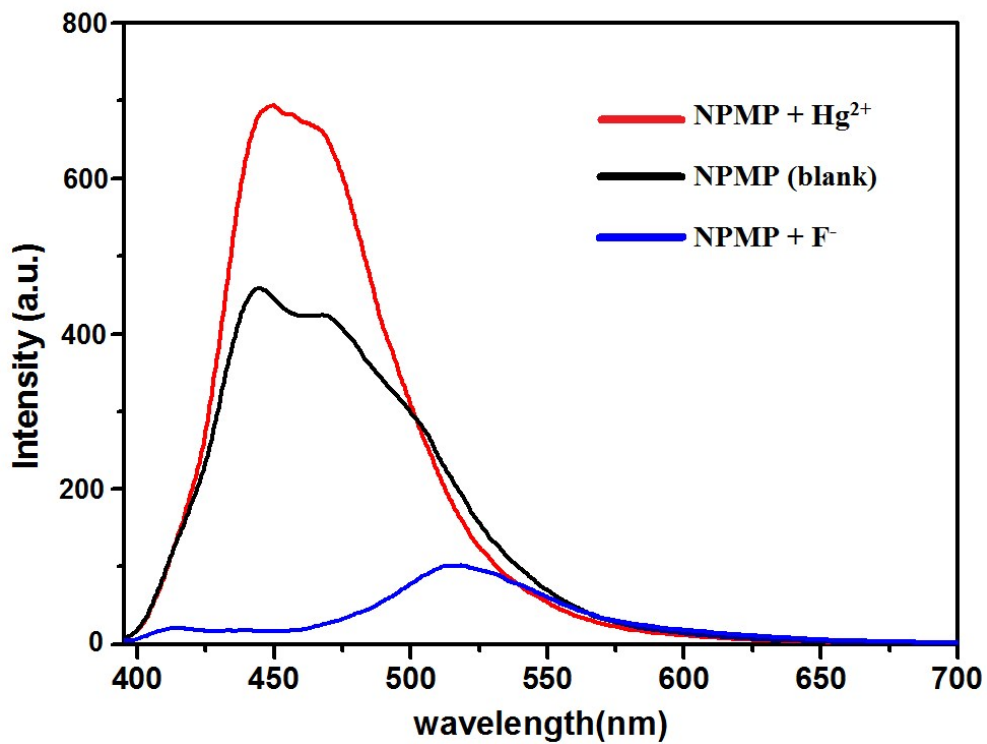

Fig. S11 Intensity changes of NPMP ( $2 \times 10^{-6} M$ ) after addition of  $F^-$  ( $2 \times 10^{-5} M$ ) and  $Hg^{2+}$  ( $10^{-5} M$ ) in 9:1 v/v DMSO-HEPES buffer at pH 7.4 (0-2eq).



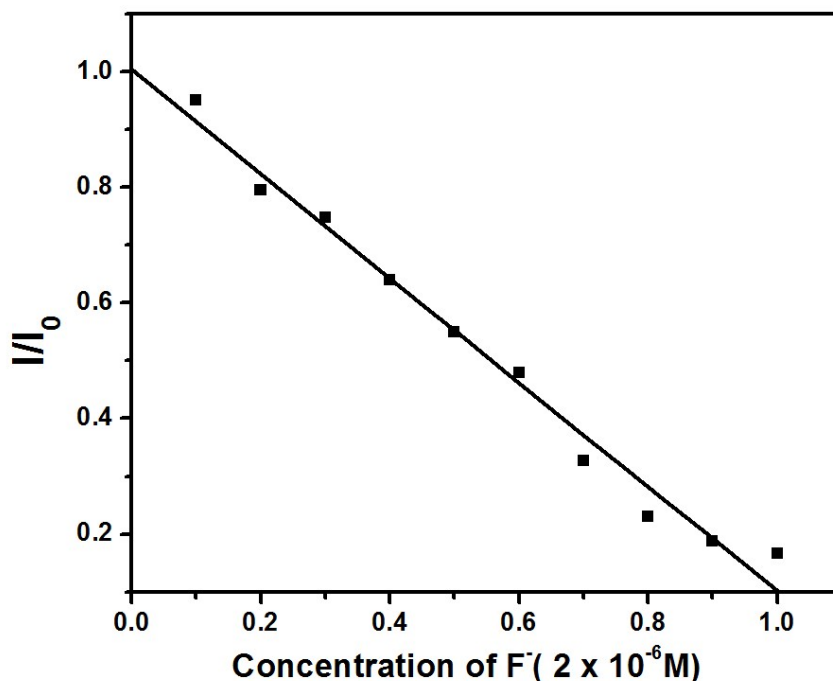

Fig. S12 Plot of ratio of emission intensity vs equivalent of F<sup>-</sup> for calculation of limit of detection.

### Preparation of cells

*Candida albicans* cells (IMTECH No. 3018) from exponentially growing culture in yeast extract glucose broth medium (pH 6.0 and incubation temperature 37°C) were washed by suspending them in normal saline and centrifuged at 3000 rpm for 10 minutes. It was washed twice with 0.1 M HEPES buffer (pH 7.4). Then cells were treated with F<sup>-</sup> solution (10 μM) for 1hr (Fig. 8a). After incubation, the cells were again washed with HEPES buffer and then incubated with **NPMP** (100 μM) for another 1hr. Cells obtained this way were mounted on a grease free glass slide and observed under a Leica DM 1000 Fluorescence microscope with UV filter (Fig. 8c). Cells treated with F<sup>-</sup> were used as control.

**Preparation of pollen grains to detect intracellular F<sup>-</sup>:** Pollen grains of *Techoma stans* (Family: Bignoniaceae) were collected from fresh buds and washed twice with 0.1 M HEPES buffer at pH 7.4. These were then treated with 10 μM F<sup>-</sup> for 1hr in 0.1 M HEPES buffer (pH 7.4) containing 0.01% Triton X100 as a permeability enhancing agent (Fig. 8b). After incubation the pollens are washed again with HEPES buffer at pH 7.4 and incubated with **NPMP** (100 μM) for 1hr. **NPMP** treated pollens were washed by centrifugation (3000 rpm for 5 minutes) using HEPES buffer and are mounted on a grease free glass slide and observed under a Leica DM 1000

fluorescence microscope equipped with a UV filter (Fig. 8d). Cells treated with  $F^-$  were used as control.
